# Olfactory object recognition based on fine-scale stimulus timing in *Drosophila*

Aarti Sehdev<sup>1†</sup>, Yunusa G. Mohammed<sup>1†</sup>, Tilman Triphan<sup>2</sup>, Paul Szyszka<sup>1\*</sup>

<sup>1</sup> University of Konstanz, Department of Biology, Neurobiology, Konstanz, 78457, Germany

<sup>2</sup> University of Leipzig, Institute of Biology, Department of Genetics, Leipzig, 04103, Germany

<sup>†</sup> These authors contributed equally to this work.

\* Corresponding author. Email: [paul@szyszkalab.com](mailto:paul@szyszkalab.com)

## Abstract

Odorants of behaviorally relevant objects (e.g., food sources) intermingle with those from other sources. Therefore, to sniff out whether an odor source is good or bad – without actually visiting it – animals first need to segregate the odorants from different sources. To do so, animals could use temporal cues, since odorants from one source exhibit correlated fluctuations, while odorants from different sources are less correlated. However, it remains unclear whether animals can rely solely on temporal cues for odor source segregation. Here we show that flies can use temporal differences in odorant arrival down to 5 milliseconds to segregate mixtures of attractive and aversive odorants, and odor source segregation works for odorants with innate, as well as learned valences. Thus, the insect olfactory system can use stimulus timing for olfactory object segregation, similar as mammalian auditory or visual systems use stimulus timing for concurrent sound segregation and figure-ground segregation.

## Introduction

A natural scene is comprised of primary stimulus features, such as the spectral reflectance, intensity and movement of objects. In addition, it consists higher-order stimulus features that reflect the spatial and temporal coherence of those stimuli that belong to the same object (e.g., the correlated movements of a person's body parts that allow us to segregate the person from the crowd). The mechanisms of how sensory systems use higher-order stimulus features for object recognition have been intensively studied in vision (1) and audition (2), but not in olfaction. Olfaction research has mainly focused on primary stimulus features, such as chemical identity, concentration and dynamics of olfactory stimuli (3, 4), yet it is still unknown how the olfactory system processes higher-order stimulus features that underlie olfactory object recognition.

Olfactory object recognition involves recognizing whether intermingling odorants originate from the same or different sources (5). The capability to segregate odor sources is behaviorally relevant. For example, it allows animals to ignore spoiled food (food and detrimental odorants originate from the same source) and to find good food in a patch of spoiled food (food and detrimental odorants originate from different sources) without actually visiting the source.

Odor source segregation can be achieved from afar by analyzing the spatial distribution of odorants in a plume. This is because the different odorants from a single source form plumes with stable odorant concentration proportions (homogeneous plumes), while odorants from different sources form plumes with variable odorant concentration proportions (heterogeneous plumes) (5, 6). Correspondingly, plume heterogeneity enables animals to segregate odor sources (slugs: (7), insects: (8–11), crabs: (12)). But how do they do it? An animal could use spatial sampling to detect the spatial heterogeneity of odorant concentrations by comparing odorant inputs along or between their olfactory organs. This strategy is

44 plausible for animals with long olfactory tentacles (slugs), antennae (insects) and antennules (crabs), but  
45 this strategy might not work for animals with small and narrow olfactory organs, such as fruit flies, because  
46 they lack spatial resolution. Alternatively, animals could use temporal sampling to detect timing differences  
47 in odorant arrival for odor source segregation, as the homogenous odorant plumes from a single source  
48 exhibit more correlated fluctuations than the heterogeneous odorant plumes from different sources (5, 6).  
49 The latter strategy might be the only one available for small animals, such as fruit flies. This affords the  
50 possibility of using the fruit fly to investigate selectively how temporal cues can be used for odor-object  
51 segregation.

52 The neural mechanism by which a heterogeneous odor plume is segmented into its constituent odor objects  
53 is unknown. Determining the causal relationship between behavioral odor source segregation and neural  
54 activity requires a genetically tractable organism that allows manipulating neural activity in identified  
55 neurons. As this is possible in the fruit fly *Drosophila melanogaster*, we here studied flies' capability to use  
56 temporal stimulus cues for odor source segregation and demonstrate that flies can use few milliseconds  
57 short differences in odorant arrival (referred to as onset asynchrony) to segregate odorants with opposing  
58 innate or learned valences. The flies' rapid olfactory processing observed here lays the foundations for  
59 causal studies on the mechanisms of olfactory object recognition and implies a rapid and temporally precise  
60 mechanism for the encoding of olfactory objects.

## 62 Results

63 To ascertain whether flies can use stimulus onset asynchronies to segregate odorants in a plume, we used a  
64 free-flying behavioral paradigm in a wind tunnel (Fig. 1A and 1B) to test flies' preference to binary mixtures  
65 of attractive and aversive odorants with different onset asynchronies. We presented short pulses of single  
66 odorants or odorant pairs. To mimic homogeneous odorant plumes from one source we presented both  
67 odorants as a synchronous mixture (no onset delay between odorants), and to mimic heterogeneous odorant  
68 plumes from different sources we presented both odorants as asynchronous mixtures (with 5 to 33  
69 millisecond delays between odorant onsets) (Fig. 1C). Note that all data shown in a given plot were collected  
70 in parallel to eliminate between-session variability. Accordingly, data points should be compared within  
71 plots but not between plots.

### 72 Tracking of temporally well-controlled odorant stimuli in the wind tunnel

73 We initially determined how reliable our stimulus delivery was over time by using a photoionization  
74 detector (PID) to record the stimulus dynamics of the different odorants used (Fig. 1D - 1I, S1A-C). The  
75 inlet of the PID was placed at the surface of the take-off platform (Fig. 1B). Each odorant was presented 50  
76 times within its odorant pair 2-butanone (BN) and butanal (BA), BN and benzaldehyde (BZ), or 2,3-  
77 butanedione (BD) and ethyl acetate (EA). The onset times (time it took from valve opening to reach 5 %  
78 of the maximum PID signal) were temporally precise across trials, with standard deviations ranging between  
79 6 ms (BN, BA) and 10 ms (BD, EA) (Fig. 1F, 1G and S1B).

80 The onset times were similar for all odorant pairs (BN/BA, BN: 744 ms  $\pm$  6 ms, BA: 745 ms  $\pm$  6 ms; BN/BZ,  
81 BN: 750 ms  $\pm$  7 ms, BZ: 756 ms  $\pm$  7 ms; BD/EA, BD: 691 ms  $\pm$  10 ms, EA: 691  $\pm$  10 ms; mean  $\pm$  SD). The  
82 rise times (time it took to reach from 5 % to 95 % of the maximum PID signal) were also similar for the  
83 odorant pair BN/BA (BN: 411  $\pm$  10 ms, BA: 428  $\pm$  12 ms; mean  $\pm$  SD) and for the odorant pair BD/EA  
84 (BD: 428 ms  $\pm$  26 ms, EA: 440 ms  $\pm$  21 ms), but less similar for the odorant pair BN/BZ (BN: 400 ms  $\pm$  12  
85 ms, BZ: 444 ms  $\pm$  9 ms) (Fig. 1H, 1I and S1C). The differences in stimulus dynamics could be explained  
86 by the difference in the molecular mass between odorants, as stimulus dynamics get slower with increasing  
87 molecular mass (in g/mol, BN: 72; BA: 72; BD: 86; EA: 88; BZ: 106) (13, 14).

88 To visualize how flies explored space based on the odorant experience, we tracked their flights in 3D. For  
89 analysis, we projected the trajectories on a plane, and calculated the probability across flies to visit a

90 particular pixel (visit probability, Fig. 2A). When presented with an attractive odorant A flies were more  
91 likely to fly towards the target (which was either the actual odor source or a black platform near the odor  
92 source, see Materials and Methods), compared to the aversive odorant B. To assess approach to the target,  
93 we counted the number of flies which reached halfway between the center of the take-off platform and the  
94 target (3.1 cm (117 pixels) for WT 1 and 2.7 cm (71 pixels) for WT 2) and calculated the approach  
95 probability by dividing this number by the total number of flies. Flies flew closer towards the target when  
96 stimulated with an attractive odorant than with an aversive odorant or a control air stimulus (Air) ( $p(A > B)$   
97  $\geq 0.999$  for BN/BZ in Fig. 1B;  $p(A > B) = 0.962$ ,  $p(A > Air) \geq 0.999$  for BN/BA/Air in Fig. 1C ; all statistical  
98 significances are given as Bayesian probabilities, see Materials and Methods) (Fig. 2B and 2C). However,  
99 in contrast to previous studies (15–18), flies rarely landed at or near the target. This discrepancy might  
100 reflect the fact that, different to these previous studies, our odorant delivery device was outside the wind  
101 tunnel. Positioning the odor delivery outside the wind tunnel prevents turbulences which could provide  
102 localization cues for the fly to land. Rather, our wind tunnel setting mimics better an odor source at distance.

103 When presenting the attractive odorant BN, depending on the experiment, 85 – 96 % of flies started flying  
104 (Table S1), and the average latency to flight was 10 – 21 s (Table S1, Fig. S1H, S1J and S2D, S2E),  
105 corresponding to approximately 5 to 10 odorant stimuli before taking off. For the aversive odorant BZ, 68  
106 % of flies started flying, and average latency to flight was 27 s, corresponding to approximately 13 odorant  
107 stimuli before taking off. Similarly, as compared to the attractive odorant BN, fewer flies started flying  
108 when stimulated with the aversive odorant BA (68 – 84 %) or with a blank air control (Air) (71 %).

### 109 **Attraction towards asynchronous mixtures of odorants with opposing innate valence**

110 To test whether flies can detect stimulus onset asynchrony, we presented BN (A) and BA (B) either as  
111 single odorants, combined in a synchronous mixture (AB) or in asynchronous mixtures in which B preceded  
112 A by 33 ms (B33A) (Fig. 3A). Note that we used the odorant pair BN/BA to test the effect of stimulus onset  
113 asynchrony rather than BN/BZ because the differences in stimulus dynamics between BN and BZ makes  
114 this odorant pair unsuitable for generating synchronous mixtures (Fig. S1).

115 Flies showed a higher approach probability for the attractive odorant A compared to the aversive odorant  
116 B ( $p(A > B) = 0.998$ ) or to the synchronous mixture AB ( $p(A > AB) = 0.993$ ) (Fig. 3A). Moreover, flies  
117 showed a higher approach probability for the asynchronous mixture B33A compared to synchronous  
118 mixture AB ( $p(B33A > AB) = 0.996$ ) or to the aversive odorant B ( $p(B33A > B) \geq 0.999$ ). This shows that  
119 flies perceive the synchronous mixture AB and the asynchronous mixture B33A differently, with the onset  
120 asynchrony making the mixture more attractive.

121 To test whether flies are sensitive for shorter onset asynchronies we applied synchronous and asynchronous  
122 mixtures which started with B and with onset times differing by 5, 10 or 33 ms (B5A, B10A, B33A) (Fig.  
123 3B). Flies presented with odorant A showed more activity in general, along with a higher visit probability  
124 near the target compared with flies presented with B. Flies showed a similar visit probability map for the  
125 synchronous mixture AB as for the aversive odorant B. However, when stimulated with the asynchronous  
126 mixtures B33A or B5A – but not B10A, flies showed more activity near the target compared to AB and B.

127 To make the quantification of flies' approach behavior more sensitive for the differences in odor valences  
128 and to account for the fact that flies distributed differently in the two different wind tunnels and  
129 experimental sets, we calculated an approach area that segregated flies' approach probabilities for the  
130 attractive odorant A and the aversive odorant B the most (Fig. 3C, Fig. S1-S3). We determined this area for  
131 each experimental set separately (see Materials and Methods). Note that this method maximizes the  
132 differences in approach probability between odorants A and B by design. Therefore, we refrain from  
133 comparing flies' approach probabilities for A or B and restrict the comparisons to the mixtures.

134 The flies' responses to the mixtures depended on the timing between B and A (Fig. 3D). For onset  
135 asynchronies of 5 ms (B5A) and 33 ms (B33A), flies were attracted to the target and scored a higher  
136 approach probability than for the synchronous mixture AB ( $p(B5A > AB) = 0.984$ ,  $p(B33A > AB) = 0.998$ ),

137 similar to that of A alone. However, for the onset asynchrony of 10 ms (B10A), flies' approach probability  
138 was not different to the approach probability for AB ( $p(B10A > AB) = 0.783$ ). While this delay-specific  
139 approach probability is somewhat surprising, we acknowledge that the responses of third-order olfactory  
140 neurons (Kenyon cells) to asynchronous mixtures can also be delay-specific, which could account for this  
141 result (19).

142 Next, we wanted to discern whether the order in which odors are presented in a mixture affects how a  
143 fly perceives the mixture. We used the same paradigm and odors as before and stimulated flies with the  
144 synchronous mixture AB, the asynchronous mixture A33B (A precedes B) and B33A (B precedes A) (Fig.  
145 3 E and S2). In this paradigm, flies showed a lower approach probability to the synchronous mixture AB  
146 than to the asynchronous mixture B33A ( $p(B33A > AB) = 0.957$ ), confirming our previous result that B33A  
147 is perceived differently to AB, and is perceived by the fly as more attractive. However, the approach  
148 probability for the asynchronous mixture A33B was not significantly different to the approach probability  
149 for AB ( $p(A33B > AB) = 0.793$ ), indicating that the two asynchronous mixtures A33B and B33A may have  
150 been also perceived differently.

151 These data show that flies can discriminate between the synchronous mixture AB and asynchronous  
152 mixtures B5A and B33A, supporting the hypothesis that flies can use stimulus onset asynchrony to  
153 segregate the attractive component A from the mixture of A and B even if they never encountered A alone  
154 (in B5A and B33A, B started before A and A ended at the same time as B). In contrast, the similar low  
155 approach probabilities for the aversive odorant B and the synchronous mixture AB is consistent with the  
156 hypothesis that flies perceive AB as coming from one source.

### 157 **Attraction towards asynchronous mixtures of odors with opposing learned valence**

158 Finally, we wanted to determine whether flies' capability to discriminate between synchronous and  
159 asynchronous mixtures only works for odors with opposing innate valence, or whether it also works for  
160 odors with opposing learned valences. To address this question, we used an autonomous differential  
161 conditioning paradigm and paired one odorant (positively conditioned stimulus, CS+) with a 1M sucrose  
162 solution and another odorant (negatively conditioned stimulus, CS-) with a saturated NaCl solution (Fig.  
163 3F). We used the odors EA and BD equally often for CS+ and CS-. This procedure eliminates all non-  
164 associative effects of the conditioning procedure (e.g., sensitization), which would also change flies'  
165 responsiveness (20). Thus CS+ and CS- only differ with regards to the learned valences, devoid of innate,  
166 odorant-specific valences.

167 Also in this experiment, flies discriminated between synchronous and asynchronous mixtures, and showed  
168 lower approach probabilities to the synchronous mixture of the CS+ and the CS- (CS+CS-) than to the  
169 asynchronous mixture CS+33CS- or CS-33CS+ ( $p(CS+33CS- > CS+CS-) = 0.965$ ,  $p(CS-33CS+ > CS+CS-)$   
170  $= 0.981$ ) (Fig. 3G and S3). Together, these findings support the hypothesis that flies can use stimulus onset  
171 asynchrony to segregate odors with both learned and innate valences from mixtures.

## 172 **Discussion**

174 We asked whether *Drosophila* can use stimulus onset asynchrony to segregate mixed odors from  
175 different sources. We found that flies show stronger attraction to an asynchronous mixture of an attractive  
176 and an aversive odorant (mimicking two odorant sources) than to a synchronous mixture (mimicking one  
177 source). These results indicate that the fly's olfactory system uses stimulus onset asynchrony for olfactory  
178 object segregation, analogous to how humans' auditory and visual systems use stimulus onset asynchrony  
179 for concurrent sound segregation (21) and figure-ground segregation (22).

### 180 **Odor-source segregation**

181 Previous studies showed that animals perceive different odors from the same source as one object while  
182 they perceive odors from different sources as separate objects. In a pioneering study, Hopfield and

183 Gelperin (7) aversively conditioned slugs to the mixture of two food odors, A and B. When A and B were  
184 homogeneously mixed during conditioning (to mimic one odor source), slugs showed aversive responses  
185 to the homogenous mixture AB but not A and B alone. However, when A and B were heterogeneously  
186 mixed during conditioning (to mimic multiple sources), slugs also showed aversive responses to A and B  
187 alone. This suggests that slugs perceived the homogenous mixture AB as different from A or B, while they  
188 perceived the heterogeneous mixture as distinct odor objects A and B. Similarly, several arthropods species  
189 can segregate attractive from aversive odorants depending on whether both are released from the same  
190 source (forming a homogeneous mixture) or from different sources (forming a heterogeneous mixture) (8–  
191 12, 23)).

192 In the above studies, animals could have achieved odor source segregation by detecting the heterogeneous  
193 distribution of odorants through a spatially heterogeneous activation across or within their olfactory organs,  
194 or they may have recognized the single odorants during bouts of their pure, unmixed presence. Compared  
195 to the above animals, *Drosophila* has tiny olfactory organs. Therefore, in lack of spatial resolution,  
196 *Drosophila* might use temporal rather than spatial stimulus cues for odor source segregation. Our data  
197 suggest that already 5 ms onset asynchrony is sufficient for *Drosophila* to segregate odorant sources, and  
198 this also works when the target is never encountered alone (in BΔtA, the target odorant A is always mixed  
199 with B, because A starts after and ends with B).

### 200 **Mechanisms of odor source segregation**

201 The odor-source segregation paradigms that were used in previous studies and in the present study were  
202 odor recognition tasks in which the odorants either had innate valences (8, 9, 12, 23) or learned valences  
203 (7, 10, 11), and it is unknown whether animals can segregate mixtures of novel odorants that have no innate  
204 or learned valence. Thus, in previous studies and our own study, to recognize the odorants A and B, the  
205 olfactory system has to match the odor-evoked neural activity patterns to a neural template of A and B. The  
206 neural templates could have developed through evolution (e.g., odorants with innate valence activate  
207 specific, valence-encoding neurons in the lateral horn (24–27)), or by associative learning (odorants with  
208 learned valence activate specific, valence-encoding neurons in the mushroom body (28–30)).

209 Flies' capability to segregate two mixed odorants A and B based on a few milliseconds onset asynchrony  
210 poses temporal constraints on the neural code for odors. The computations that the olfactory system could  
211 use to perform odorant segregation are coupled to how the animal perceives the single odorants and their  
212 mixtures. As we do not know what the flies actually smell, but we can measure their attraction towards the  
213 odorants, we can only speculate about the perceptual differences between synchronous and asynchronous  
214 mixtures. In the following we shall discuss two alternative mechanisms of odor source-segregation based  
215 on temporal stimulus cues.

### 216 **Shift from synthetic to analytic mixture processing?**

217 Flies could perceive the synchronous mixture AB synthetically such that information about the components  
218 A and B is lost ( $AB \neq A + B$ ), while they perceive the asynchronous mixture AΔtB analytically such that  
219 information about A and B is preserved ( $A\Delta tB = A + B$ ).

220 Behavioral experiments in honey bees provide support for synthetic processing of synchronous mixtures:  
221 when conditioned to an odorant mixture, bees show lower response probabilities for the individual  
222 components than for the conditioned mixture (31). Further evidence for synthetic mixture processing is  
223 provided by bees' capability to solve biconditional discrimination (32) and negative patterning tasks (33).

224 Physiological experiments also indicate that synchronous mixtures are processed synthetically, while  
225 asynchronous mixtures are processed more analytically. Mixing of multiple odorants changes the neuronal  
226 response patterns across olfactory receptor neurons and second-order olfactory neurons (projection  
227 neurons) such that component information gets partly lost (19, 34–37). In contrast, the responses of  
228 projection neurons to asynchronous mixtures partly match those evoked by the individual components, with

229 the first arriving odorant often dominating the response pattern (11, 19, 38, 39). However, such dominance  
230 of the first arriving odorant occurred neither in behavioral experiment in honey bees (10) nor in flies (this  
231 study). We therefore conclude that an asynchrony-induced shift from synthetic to a more analytic mixture  
232 representation cannot fully explain the behavioral odor source segregation observed in flies.

### 233 **Analytical mixture processing and parallel encoding of source separation?**

234 Alternatively, flies could perceive the identities and/or valences of both synchronously and asynchronously  
235 mixed odorants A and B analytically, and the information that odorant A and B belong to the same or to  
236 different sources could be directly encoded in the timing between A- and B-activated identity- or valence-  
237 encoding neurons.

238 Although there is evidence for synthetic processing of synchronous mixtures in insects (31–33), there is  
239 also evidence for analytical mixture processing: when honey bees are trained to respond to a multi-odorant  
240 mixture and afterwards are tested with the single odorants, they respond to most of the odorants (40, 41).  
241 Analytic mixture processing has also been demonstrated in blocking experiments, in which previous  
242 conditioning to odorant A reduces (or blocks) conditioning to B during training with AB, because A already  
243 predicts the reward (42). Experiments in *Drosophila* provide further evidence for analytical mixture  
244 processing, as flies' responses to the synchronous mixture of two odorants with opposing valences A and  
245 B add up linearly (43, 44). Moreover, *Drosophila* fails in biconditional discrimination or negative patterning  
246 tasks, which require synthetic mixture processing, suggesting that *Drosophila* processes mixtures  
247 analytically (45).

248 In accordance with these behavioral indications of analytic mixture perception, neuronal response properties  
249 would support analytical mixtures processing: even though mixtures suppress the response strength of  
250 olfactory neurons, those neurons that respond strongly to the components generally also respond strongly  
251 to the mixture (11, 19, 34, 35, 39). Thus, the across-neuron activity pattern evoked by the synchronous  
252 mixture largely includes the across-neuron activity pattern evoked by the single components. Moreover,  
253 *Drosophila* Kenyon cell responses to a mixture AB resemble the superposition of their responses to the  
254 single components A and B (46). Therefore, the neuronal representations of both synchronous and  
255 asynchronous mixtures likely contain sufficient odorant component information to allow for analytic  
256 mixture processing.

257 Whether or not two odorants A and B originate from one or two sources could be detected by coincidence-  
258 detecting neurons that receive input from valence-encoding neurons of the lateral horn (for odorants with  
259 innate valences; (24–27)) or from output neurons of the mushroom body (for odorants with learned  
260 valences; (28–30)). Those coincidence-detecting neurons would respond to synchronous input from the A-  
261 and B- activated valence-encoding neurons (A and B come from one source) but not to asynchronous input  
262 (A and B come from different sources). Coincidence detection could be mediated by NMDA glutamate  
263 receptors (47). The existence of glutamatergic neurons and NMDA receptors in both the lateral horn and in  
264 the mushroom body (48), and of glutamatergic valence-encoding mushroom body output neurons in  
265 *Drosophila* (29, 49), is consistent with this hypothetical mechanism.

266 Detecting asynchronies of a few milliseconds between the neural representations of odorant A and B  
267 requires temporally precise encoding of odorant onsets – a requirement that appears to be fulfilled by insect  
268 olfactory receptor neurons (50–52). In particular, *Drosophila* olfactory receptor neurons respond to  
269 odorants rapidly (with first spike latencies down to 3 ms) and across neurons of the same type, the standard  
270 deviation of the first spike latencies can be as low as 0.2 ms (53). This high temporal precision of first  
271 odorant-evoked spikes across olfactory receptor neurons would allow a rapid, spike timing-based coding  
272 scheme for odorant onset and identity (13, 53, 54), which could underlie flies' capability to segregate  
273 odorants based on onset asynchrony.

274

275

## Materials and Methods

276

### Animals

277

Wild-type Canton S *Drosophila melanogaster* were reared on standard medium (100 mL contain 7.1 g cornmeal, 6.7 g fructose; 2.4 g dry yeast, 2.1 g sugar beet syrup, 0.7 g agar, 0.61 ml propionic acid, and 0.282 g ethyl paraben) under a 12:12 hours light:dark cycle (light from 09:00 to 21:00), at 25 °C and 60% relative humidity. All flies used in the experiments were female, aged between four and eight days old.

280

281

### Wind tunnel

282

We carried out experiments in two wind tunnels, referred to here as wind tunnel 1 (WT 1, data shown in Fig. 3D) and wind tunnel 2 (WT 2 data shown in all other figures). We filmed each experiment using Raspberry Pi cameras (Raspberry Pi Camera Module v2; Raspberry Pi 3 model B) for 2 or 3 minutes with a resolution of 640 x 480 pixels and 90 frames s<sup>-1</sup>; the first 10 seconds of flight duration was used for the analysis.

283

284

285

286

287

Both wind tunnels were constructed from clear Plexiglas. The inner side walls and floor were covered by a random checker board pattern (grey on white paper). The dimension of WT 1 was 1.2 m x 0.19 m x 0.19 m and of WT 2 was 2 m x 0.40 m x 0.40 m. The exhaust took in room air (28 °C, 60 % relative humidity) through the tunnel and removed it from the setup building via a ventilation shaft. An aluminum honeycomb grid (hole diameter x length: 0.53 cm x 3 cm, WT 1; 0.32 cm x 9.7 cm, WT 2) at the inlet and a grid at the outlet of the tunnel created a laminar flow throughout. The wind speed was 0.4 m s<sup>-1</sup>. We injected odorants into the inlet of the wind tunnel with an olfactory stimulator (14). The outlet of the olfactory stimulator was 1 cm in diameter and was placed just outside of the honey comb grid, creating a laminar odorant plume within the tunnel. Flies entered the tunnel through a glass tube that was connected to a take-off platform whose center was 7.5 cm (WT 1) or 6 cm (WT 2) downstream from the inner side of the honeycomb grid. We also placed a black platform near the odor source, as recent studies have demonstrated that *Drosophila* stimulated by an attractive odorant approach dark spots (17, 18). In WT 1 we used two cameras to film the flies. One camera was placed above the wind tunnel to capture the x-y plane of movement, whereas the other was placed at the side of the wind tunnel (90° to the other camera), thus capturing the movement of the fly within the z-y plane. The volume filmed measured 17.3 cm x 17.3 cm x 13.0 cm (x, y, z). In WT 2 we used a single camera placed above the wind tunnel to record the fly trajectories in the x-y plane. In order to capture the z-y plane of the flight track, we positioned a mirror at a 45° angle to the camera inside of the wind tunnel. The volume filmed measured 13.7 cm x 10.3 cm x 9.5 cm (x, y, z). Both wind tunnels were illuminated with indirect, homogeneous, white light with a color temperature of 6500 K (WT 1: compact fluorescent light, tageslichtlampe24.de; WT 2: LEDs, led-konzept.de). Additionally, we used 830 nm backlight illumination to get contrast-rich images of the flies.

288

289

290

291

292

293

294

295

296

297

298

299

300

301

302

303

304

305

306

307

308

### Odorant delivery

309

We measured flies' odor tracking behavior using either odorants with innate (Fig.s 2 and 3) or conditioned (Fig. 3) valence. The pairs of odorants with innate valence used were 2-butanone (BN) and butanal (BA), and 2-butanone and benzaldehyde (BZ). For the conditioned odorants, we used 2,3-butanedione (BD) and ethyl acetate (EA). All odorants were supplied by Sigma Aldrich. We chose these odorants based on their valences measured in tethered flying flies (44). In this study, BN is innately attractive, whereas BA and BZ are innately aversive, and both BD and EA are slightly innately attractive. Throughout all experiments, innately attractive odorants were referred to as A and innately aversive odorants as B.

310

311

312

313

314

315

316

Odorants were delivered into the wind tunnels using a custom-made multichannel olfactory stimulator (14). Pure odorants were stored in 20 ml glass vials (Schmidlin) sealed with a Teflon septum. The cross section of the odorant surface was 3.1 cm<sup>2</sup>. The headspace of odorized air was permanently drawn into the air dilution system using flowmeters (112-02GL, Analyt-MTC) and an electronic pressure control (35898;

317

318

319

320 Analyt-MTC). The stimulator had three channels: one for each odorant and one for blank air. The odorant  
321 vials were constantly flushed with clean air throughout the experiment, so that the headspace concentration  
322 reached a steady state of odorant evaporation into the air and odorant removal by the air flush. Note that  
323 due to the permanent air stream the headspace odorant concentration never saturated. The total flow per  
324 odorant channel was always 300 ml min<sup>-1</sup>. In WT 1, BN was released at 50 ml min<sup>-1</sup> and added to 250 ml  
325 min<sup>-1</sup> air, and BA was released at 30 ml min<sup>-1</sup> and added to 270 ml min<sup>-1</sup> air (experiments in Fig. 3). In WT  
326 2, BN, BA and BZ were released at 50 ml min<sup>-1</sup> and were added to 250 ml min<sup>-1</sup> air (experiments in Fig.s 2  
327 and 3). For the conditioned odorants we used the PID to determine the head space concentrations in the  
328 conditioning tubes (see below) by moving the PID needle rapidly into the conditioning tubes to prevent  
329 dilution in odorant concentration due to air suction of the PID. These concentrations from the conditioning  
330 paradigm were then adjusted in the odor delivery device by measuring the odorant concentration just above  
331 the take-off platform with the PID. EA was released at 4 ml min<sup>-1</sup> and added to 296 ml min<sup>-1</sup> air, and BD  
332 was released at 1.84 ml min<sup>-1</sup> and added to 298.16 ml min<sup>-1</sup> air (experiments in Fig. 3).

333 The two odorant channels and a blank channel (each with an airstream of 300 ml min<sup>-1</sup>) were combined and  
334 injected into a carrier air stream of 410 ml min<sup>-1</sup> and, resulting in a total air flow at the outlet of the stimulator  
335 of 1.31 L min<sup>-1</sup>, and a wind speed of 0.4 ms<sup>-1</sup>.

336 Stimuli were presented either as single odorants (either A or B), as a synchronous mixture of odorants  
337 presented simultaneously (AB) or as an asynchronous mixture, with different time delays between the  
338 release of the odorants. In BΔtA, B starts before A, with Δt being either 5 ms, 10 ms and 33 ms. In AΔtB,  
339 A starts before B, with Δt being 33 ms (Fig. 1C). Note that the trailing odorant ended at the same time as  
340 the preceding odorant. Stimuli were delivered in odorant pulses of 500 ms, and the interstimulus interval  
341 was 2 s. To exclude that differences in flies' approach behavior towards the asynchronous and synchronous  
342 mixture reflected responses to mechanical cues produced by valve switching, we applied the single odorants  
343 together with a 33 ms delayed blank stimulus (both stimuli ended at the same time).

344 During experiments, all odorants were removed from the wind tunnel via an exhaust into the outside  
345 atmosphere. Between experiments using different odorants, the stimulator valves were flushed out over  
346 night to remove any residual odorant. Valves were controlled by compact RIO systems equipped with  
347 digital I/O modules Ni-9403 and odorant delivery was controlled by software written by Stefanie Neupert  
348 in LabVIEW 2011 SP1 (National Instruments).

### 349 **Experimental protocol for odorants with innate valence**

350 Day 1: Between 13:00 and 16:00, approximately 100 adult flies were removed from standard corn meal  
351 agar food and were subjected to food and water starvation for 24 hours in a cage (30×30×30 cm, BugDorm-  
352 1, BugDorm) that allowed them to move around freely, in a room with an approximate relative humidity of  
353 60%, a temperature of 25 - 28 °C and 12 hour daylight cycle.

354 Day 2: Between 15:00 and 20:00, individual, flying female flies were removed from the cage and placed  
355 into a PVC tube through which they could walk freely to enter the wind tunnel and reach the take-off  
356 platform. Once the fly reached the take-off platform, odorant stimulation started. Each fly was stimulated  
357 repeatedly with the same odorant stimulus. During one experimental session an equal number of flies were  
358 stimulated with the different stimuli (as shown in each data panel) so that day-to-day variation would affect  
359 the behavior to all stimuli equally. The order of stimuli was alternated. After each experiment we removed  
360 and discarded the fly.

361 Each different experimental paradigm was made up of different sets, depending on the presence and location  
362 of the black landing platform. In the preliminary experiments assessing attraction to upwind flow  
363 (BN/BA/Air), there was only one set, with the landing platform placed centrally at the location of the odor  
364 source. For the preliminary experiments assessing attraction in the wind tunnel (BN/BZ), the first set placed  
365 the landing platform 1.5 cm to the right of the odor source, whereas the second set place the platform at the  
366 odor source directly. In the experiments to assess onset delays (BN/BA), there was only one set, where the



367 black platform was located 0.5 cm to the right of the odor source (x-y plane). For the experiments assessing  
368 odorant order (BN/BA), the first set contained no landing platform, whereas the second set contained the  
369 landing platform at the location of the odor source.

### 370 **Differential conditioning**

371 Day 1: Between 15:00 and 16:00, approximately 100 adult flies were removed from standard corn meal  
372 agar food and put into a cage (30×30×30 cm, BugDorm-1, BugDorm) that contained a differential  
373 conditioning apparatus (Fig. 3F). Flies could move around freely at an approximate relative humidity of  
374 30%, a temperature of 25 - 28 °C and normal 12 hour daylight cycle for 24 h.

375 We trained flies in a differential conditioning paradigm to associate one odorant (positively conditioned  
376 stimulus, CS+) with 1 M sucrose solution as the positive reinforcer and to associate another odorant  
377 (negatively conditioned stimulus, CS-) with saturated NaCl solution as negative reinforcer (Fig. 3F). We  
378 used BD and EA as conditioned odorants. We balanced the experiments so that in half of the experiments  
379 we used BD as CS+ and EA as CS- and vice versa. CS+ and sucrose solution and CS- and NaCl solution  
380 were applied via two horizontally positioned plastic tubes (15 ml, 120 x 17 mm; Sarstedt). Each tube  
381 contained 10 ml of either sucrose or NaCl solution and were plugged with a cotton wool to avoid spillage.  
382 The frontal 2 cm of each tube remained empty. The odorant was delivered into this empty space via  
383 diffusion through a shortened head of a needle (1.2 x 40 mm, Sterican) which ended 1.5 cm inside the empty  
384 space of the tube. The needle was connected with a 20 ml glass vial (Schmidlin) that contained the pure  
385 odorant and was sealed with a Teflon septum. Thus, to reach the sucrose or NaCl solution, flies had to move  
386 through odorized air inside the plastic tube.

387 Day 2: Between 15:00 and 16:00, the conditioning apparatus was removed and flies were subjected to food  
388 and water starvation for the following 24 h in a room with an approximate relative humidity of 60%, a  
389 temperature of 25 - 28 °C and normal 12 hour daylight cycle.

390 Day 3: Flies were tested in the wind tunnel as described above in the section **Experimental protocol for**  
391 **odorants with innate valence** (Day 2). The conditioning experiments also had two sets, depending on the  
392 location of the black landing platform. In the first set, the black platform was located 1.5 cm to the right of  
393 the odor source (x-y plane) and in the second set, the black platform was at the location of the odor source.

### 394 **Stimulus dynamics**

395 To assess the dynamics and precision of the different stimuli, we used a photoionization detector (PID;  
396 miniPID model 200B; Aurora Scientific) to record the concentration change of pulses of each of the odorant  
397 pairs (BN and BA, BN and BZ, BD and EA) within the wind tunnel. Each pulse had a duration of 500 ms,  
398 and an interstimulus interval of 7 s to allow the odorant to clear from the odor delivery device and/or PID  
399 and to allow the PID signal to return to baseline before the following pulse was given. We gave a sequence  
400 of 100 pulses, alternating between odorant A and odorant B (7 s interval between A and B), thus 50 pulses  
401 of each odorant. For each odorant pulse, we calculated the onset time as the time it took to reach 5 % of the  
402 maximum PID signal, and the rise time as the time it took for the PID signal to reach from 5 % to 95 % of  
403 its maximum. We also calculated the difference in both the onset times and in the rise times between each  
404 of the 50 pairs of pulses (A – B).

### 405 **Calculating the distance to the target**

406 To calculate the Euclidean distance to the source, we obtained the x, y and z coordinates of the fly for the  
407 first 10 s of flight of the recording. If the fly did not take off from the entry platform, we calculated its  
408 closest point to the source on the platform.

409 For WT 1, we used two cameras which were calibrated within a two pixel scale of each other, thus we did  
410 not scale them any further. Both cameras were triggered simultaneously with a TTL pulse, however to  
411 ensure that they did not go out of sync, all videos were aligned by first frame of flight. We calculated the  
412 Euclidean distance of the fly to the target:

413 Euclidean distance =  $\sqrt{(x - x_0)^2 + (y - y_0)^2 + (z - z_0)^2}$

414 Where x, y and z are the coordinates of the fly's location in a particular frame, and x0, y0 and z0 are the  
415 coordinates of the target.

416 For WT 2, a single camera was used to film the fly trajectories in the x and y plane. In order to record the  
417 movement in the z plane simultaneously, a mirror was placed at 45° to the x-y plane. Thus on the right half  
418 of the video recordings, the x-y plane was recorded, and on the left half of the video, the mirrored z-y plane  
419 was recorded. However, this led to shrinking of the image in the left half, approximately 1.3 times smaller  
420 than the original objects on the right half. Therefore, we calculated the fly's distance to the target in WT 2  
421 by:

422 Euclidean distance =  $\sqrt{(x - x_0)^2 + (y - y_0)^2 + ((z - z_0) * 1.3)^2}$

423 Where x, y and z are the coordinates of the fly's location in a particular frame, and x0, y0 and z0 are the  
424 coordinates of the target

### 425 **Quantifying approach with the “half-distance threshold”**

426 In order to measure approach behavior, we used the halfway distance between the frontal border of take-  
427 off platform and the target to determine the circular approach area around the target. In WT 1, we used a  
428 value of 117 pixels (3.2 cm) for the radius and in WT 2 a value of 71 pixels (2.7 cm).

### 429 **Quantifying approach with the “maximized A-B difference threshold”**

430 In order to make the analysis more sensitive for the difference between the approach probabilities for the  
431 attractive and the aversive odors A and B, we defined an approach area that segregated the flies' approach  
432 probability for A (or CS+) and B (or CS-). To determine the radius of this area, we took the Euclidean  
433 distance to target for each fly that was exposed to the attractive odorant A (or CS+) alone or the aversive  
434 odorant B (or CS-) alone; those flies that encountered mixtures of odors were not incorporated in this  
435 process. The minimum distances were arranged in ascending order, and at each distance, we counted the  
436 number of flies from treatment A and treatment B that were included within this threshold distance. Thus  
437 for each of these distances, we calculated the difference in approach probabilities by:

438 Difference in approach probabilities =  $\frac{A_{in}}{A_{in}+A_{out}} - \frac{B_{in}}{B_{in}+B_{out}}$

439 Where  $A_{in}$  represents the number of flies that were presented with odorant A and were included below the  
440 threshold,  $A_{out}$  is the number of flies presented with A but excluded above the threshold.  $B_{in}$  and  $B_{out}$  were  
441 the same measures for the flies that were presented with odorant B. We then plotted the thresholding index  
442 against the vector of minimum distances, and fitted a curve using locally weighted scatterplot smoothing  
443 (Fig. 3C and S1D, S1E, S2C, S2C, S3B and S3C). We took the distance that corresponded to the maximum  
444 peak of the curve as the radius of the approach area, as this point indicates the greatest separation between  
445 the two treatment groups. Since we used treatments A and B in defining the approach areas, we did not  
446 include these flies in the statistical analyses.

### 447 **Approach probability**

448 In both WT 1 and WT 2 we filmed two angles of the flight area. Thus in each wind tunnel, there were two  
449 separate areas of approach, one for each of the two cameras for WT 1, and one for each side of the video  
450 screen for WT 2 (mirrored and original view). To calculate the approach probability, we gave each fly a  
451 binary score. The coordinate of each fly in every frame was recorded and tested as to whether it fell within  
452 the approach area boundaries. If a fly entered the approach area at any frame within 10 seconds after take-  
453 off, the fly was given a score of 1; if not, was given a score of 0. This was done for each camera (WT 1) or  
454 video side (WT 2), and then the results were combined so that only if a fly was in both areas of approach at

455 the same time point, would it be given a score of 1. Finally, we calculated the proportion of flies in each  
456 treatment that entered the approach area to get the approach probability.

### 457 **Visit probability maps**

458 We extracted the x-y coordinates of the fly during the first ten seconds of flight. We divided the recording  
459 image into 20 x 20 pixel bins to create two visit probability maps. Each bin was represented by a cell in the  
460 map. We then plotted each coordinate point onto the visit map, giving the cell a score of 1 if one or more  
461 points fell into the bin, or a 0 if no points fell into the bin. A matrix of zeros was generated for those flies  
462 that did not fly from the entry platform. We calculated the mean for each pixel bin across all of the flies in  
463 a treatment group.

### 464 **Response latency**

465 We selected the flies that started flying within 10 000 frames after entering the take-off platform (111 s,  
466 corresponding to approximately 50 odorant pulses). We defined the individual response latency for each fly  
467 as the time point of flight minus the time point of entry onto the take-off platform.

### 468 **Statistical Analysis**

469 All statistics were performed using Bayesian data analysis, based on (55). To compare the approach  
470 probabilities, we fitted a generalized linear model using the iteratively reweighted least squares method for  
471 fitting. We assumed a flat prior and set a binomial family due to the binary nature of the data:

$$472 p(y_i|p_i, n_i) \sim \text{Binom}(p_i, n_i)$$

473 where  $y_i$  is the number of successes for treatment  $i$ ,  $p_i$  is the probability of success for observation  $i$ , and  $n_i$   
474 is the number of trials for treatment  $i$ . We used the link function “logit”, which is commonly used for  
475 binomial data, to transform the expected values of the outcome variable (probability ranging from 0 to 1)  
476 into the range of the linear predictor. We extracted the estimated model parameters for each treatment and  
477 then back-transformed the linear predictor to the scale of the outcome variable.

478 We simulated 100 000 values from the joint posterior distribution of the model parameters. To obtain the  
479 fitted value for each treatment, we derived the linear predictor by multiplying the model matrix with the  
480 corresponding set of model parameters for each set of simulated values, and then back-transformed the  
481 results. We extracted the 2.5 % and the 97.5 % quantiles, creating a 95 % credible interval.

482 To calculate the certainties that one treatment group had a significantly different approach probability to  
483 another group, we compared pairs of treatment groups individually. The proportion of simulations in which  
484 one treatment group was higher than that of the compared treatment group represents the posterior  
485 probability that the first treatment group has a higher approach probability than the second group. In the  
486 figures, we used stars for comparisons between the synchronous mixture AB and the asynchronous  
487 mixtures, and we used different letters for comparisons between all stimuli. If the posterior probability was  
488 greater than 0.95, we determined the approach probabilities as significantly different (\* or different letters).  
489 If the posterior probability was greater than 0.99 or 0.999, we indicated their significance as \*\* and \*\*\*  
490 respectively (not indicated for comparisons between all stimuli, see text for exact posterior probabilities).

491 To compare the response latencies across treatment groups, we fitted a linear model using the synchronous  
492 mixture AB as the reference level. Similar to an ANOVA, this fits a linear regression to the dataset but  
493 using a categorical predictor variable instead of a continuous one. Here, treatment is the categorical variable,  
494 which has several indicator variables. AB was always used as the reference level, thus the other indicator  
495 variables were either A, B, A33B, and B33A, or A, B, B5A, B10A and B33A, depending on the  
496 experimental design. The former is demonstrated in the equation below:

$$497 \hat{y}_i = \beta_0 + \beta_1 I(g_i = 1) + \beta_2 I(g_i = 2) + \beta_3 I(g_i = 3) + \beta_4 I(g_i = 4) + \beta_5 I(g_i = 5)$$

$$498 y_i \sim \text{Norm}(\hat{y}_i, \sigma^2)$$

499 Where  $y_i$  is the  $i$ -th observation and each  $\beta$  value corresponds to the model coefficients for each treatment  
500 group  $g$ . The residual variance is  $\sigma^2$ . We simulated from the posterior distribution of the model parameters  
501 100 000 times to obtain the group means and the 2.5 % and 97.5 % quantiles.

502 To determine whether one treatment group showed a significantly higher response latency compared to  
503 another group, we obtained the posterior distribution of the difference between the means of the two groups,  
504 by calculating the difference for each draw from the joint posterior distribution of the group means. We  
505 then calculated the proportion of draws from the joint posterior distribution for which the mean of the first  
506 group was higher than the second group. If the posterior probability was higher than 0.95, it was deemed  
507 significantly different (\*). If the posterior probability was higher than 0.99 or 0.999, we indicated their  
508 significance as \*\* and \*\*\* respectively. For all data analysis, R version 3.5.0 (“Joy in Playing”) were used  
509 (56).

## 511 References

- 512 1. Z. Kourtzi, C. E. Connor, Neural representations for object perception: structure, category, and adaptive  
513 coding. *Annu. Rev. Neurosci.* **34**, 45–67 (2011).
- 514 2. J. K. Bizley, Y. E. Cohen, The what, where and how of auditory-object perception. *Nat. Rev. Neurosci.*  
515 **14**, 693–707 (2013).
- 516 3. C. G. Galizia, Olfactory coding in the insect brain: Data and conjectures. *Eur. J. Neurosci.* **39**, 1784–1795  
517 (2014).
- 518 4. N. Uchida, C. Poo, R. Haddad, Coding and Transformations in the Olfactory System. *Annu. Rev.*  
519 *Neurosci.* **37**, 363–385 (2014).
- 520 5. J. J. Hopfield, Olfactory computation and object perception. *Proc. Natl. Acad. Sci.* **88**, 6462–6466 (1991).
- 521 6. A. Celani, E. Villermaux, M. Vergassola, Odor landscapes in turbulent environments. *Phys. Rev. X.* **4**, 1–  
522 17 (2014).
- 523 7. J. F. Hopfield, A. Gelperin, Differential conditioning to a compound stimulus and its components in the  
524 terrestrial mollusc *Limax maximus*. *Behav. Neurosci.* **103**, 329–333 (1989).
- 525 8. T. C. Baker, H. Y. Fadamiro, A. A. Cosse, Moth uses fine tuning for odour resolution. *Nature.* **393**, 530–  
526 530 (1998).
- 527 9. M. N. Andersson, M. Binyameen, M. M. Sadek, F. Schlyter, Attraction Modulated by Spacing of  
528 Pheromone Components and Anti-attractants in a Bark Beetle and a Moth. *J. Chem. Ecol.* **37**, 899–911  
529 (2011).
- 530 10. P. Szyszka, J. S. J. S. Stierle, S. Biergans, C. G. G. Galizia, The speed of smell: odor-object segregation  
531 within milliseconds. *PLoS One.* **7**, e36096 (2012).
- 532 11. D. Saha *et al.*, A spatiotemporal coding mechanism for background-invariant odor recognition. *Nat.*  
533 *Neurosci.* **16**, 1830–9 (2013).
- 534 12. M. Weissburg, L. Atkins, K. Berkenkamp, D. Mankin, Dine or dash? Turbulence inhibits blue crab  
535 navigation in attractive-aversive odor plumes by altering signal structure encoded by the olfactory  
536 pathway. *J. Exp. Biol.* **215**, 4175–82 (2012).
- 537 13. C. Martelli, J. R. Carlson, T. Emonet, Intensity invariant dynamics and odor-specific latencies in olfactory  
538 receptor neuron response. *J. Neurosci.* **33**, 6285–6297 (2013).
- 539 14. G. Raiser, C. G. G. Galizia, P. Szyszka, A High-Bandwidth Dual-Channel Olfactory Stimulator for  
540 Studying Temporal Sensitivity of Olfactory Processing. *Chem. Senses.* **42**, bjw114 (2016).

- 541 15. S. A. Budick, M. H. Dickinson, Free-flight responses of *Drosophila melanogaster* to attractive odors. *J.*  
542 *Exp. Biol.* **209**, 3001–3017 (2006).
- 543 16. B. Houot, V. Gigot, A. Robichon, J.-F. Ferveur, Free flight odor tracking in *Drosophila*: Effect of wing  
544 chemosensors, sex and pheromonal gene regulation. *Sci. Rep.* **7**, 40221 (2017).
- 545 17. N. Saxena, D. Natesan, S. P. Sane, Odor source localization in complex visual environments by fruit flies.  
546 *J. Exp. Biol.* **221**, jeb172023 (2018).
- 547 18. F. van Breugel, A. Huda, M. H. Dickinson, *Drosophila* have distinct activity-gated pathways that mediate  
548 attraction and aversion to CO<sub>2</sub>. *bioRxiv*, 227991 (2017).
- 549 19. B. M. Broome, V. Jayaraman, G. Laurent, Encoding and Decoding of Overlapping Odor Sequences.  
550 *Neuron.* **51**, 467–482 (2006).
- 551 20. T. Tully, *Drosophila* learning: Behavior and biochemistry. *Behav. Genet.* **14**, 527–557 (1984).
- 552 21. R. A. Rasch, Perception of Simultaneous Notes Such as in Polyphonic Music. *Acustica.* **40**, 21–33 (1978).
- 553 22. M. Usher, N. Donnelly, Visual synchrony affects binding and segmentation in perception. *Nature.* **394**,  
554 179–182 (1998).
- 555 23. A. A. Nikonov, W. S. Leal, Peripheral coding of sex pheromone and a behavioral antagonist in the  
556 Japanese beetle, *Popillia japonica*. *J. Chem. Ecol.* **28**, 1075–89 (2002).
- 557 24. G. S. X. E. Jefferis *et al.*, Comprehensive Maps of *Drosophila* Higher Olfactory Centers: Spatially  
558 Segregated Fruit and Pheromone Representation. *Cell.* **128**, 1187–1203 (2007).
- 559 25. E. Roussel, J. Carcaud, M. Combe, M. Giurfa, J.-C. Sandoz, Olfactory Coding in the Honeybee Lateral  
560 Horn. *Curr. Biol.* **24**, 561–567 (2014).
- 561 26. A. Strutz *et al.*, Decoding odor quality and intensity in the *Drosophila* brain. *Elife.* **3**, e04147 (2014).
- 562 27. J. M. Jeanne, M. Fişek, R. I. Wilson, The Organization of Projections from Olfactory Glomeruli onto  
563 Higher-Order Neurons. *Neuron.* **98**, 1198–1213.e6 (2018).
- 564 28. M. F. Strube-Bloss, M. P. Nawrot, R. Menzel, Mushroom Body Output Neurons Encode Odor – Reward  
565 Associations. *J. Neurosci.* **31**, 3129–3140 (2011).
- 566 29. Y. Aso *et al.*, Mushroom body output neurons encode valence and guide memory-based action selection  
567 in *Drosophila*. *Elife.* **3**, e04580 (2014).
- 568 30. T. Hige, Y. Aso, M. N. Modi, G. M. Rubin, G. C. Turner, Heterosynaptic Plasticity Underlies Aversive  
569 Olfactory Learning in *Drosophila*. *Neuron.* **88**, 985–998 (2015).
- 570 31. B. H. Smith, Analysis of interaction in binary odorant mixtures. *Physiol. Behav.* **65**, 397–407 (1998).
- 571 32. S. Chandra, B. H. Smith, An analysis of synthetic processing of odor mixtures in the honeybee (*Apis*  
572 *mellifera*). *J. Exp. Biol.* **201**, 3113–21 (1998).
- 573 33. N. Deisig, H. Lachnit, M. Giurfa, F. Hellstern, Configural olfactory learning in honeybees: Negative and  
574 positive patterning discrimination. *Learn. Mem.* **8**, 70–78 (2001).
- 575 34. N. Deisig, M. Giurfa, H. Lachnit, J. C. Sandoz, Neural representation of olfactory mixtures in the  
576 honeybee antennal lobe. *Eur. J. Neurosci.* **24**, 1161–1174 (2006).
- 577 35. A. F. Silbering, C. G. Galizia, Processing of odor mixtures in the *Drosophila* antennal lobe reveals both  
578 global inhibition and glomerulus-specific interactions. *J. Neurosci.* **27**, 11966–77 (2007).
- 579 36. D. Münch, B. Schmeichel, A. F. Silbering, C. G. Galizia, Weaker ligands can dominate an odor blend due  
580 to syntopic interactions. *Chem. Senses.* **38**, 293–304 (2013).

- 581 37. D. Münch, C. G. Galizia, Take time: odor coding capacity across sensory neurons increases over time in  
582 *Drosophila*. *J. Comp. Physiol. A*. **203**, 959–972 (2017).
- 583 38. T. Nowotny, J. S. J. S. Stierle, C. G. G. Galizia, P. Szyszka, Data-driven honeybee antennal lobe model  
584 suggests how stimulus-onset asynchrony can aid odour segregation. *Brain Res.* **1536**, 119–34 (2013).
- 585 39. J. S. J. S. Stierle, C. Giovanni Galizia, P. Szyszka, C. G. Galizia, P. Szyszka, Millisecond Stimulus Onset-  
586 Asynchrony Enhances Information about Components in an Odor Mixture. *J. Neurosci.* **33**, 6060–6069  
587 (2013).
- 588 40. D. Laloi, B. Roger, M. M. Blight, L. J. Wadhams, M. H. Pham-Delegue, Individual learning ability and  
589 complex odor recognition in the honey bee, *Apis mellifera* L. *J. Insect Behav.* **12**, 585–597 (1999).
- 590 41. J. Reinhard, M. Sinclair, M. V. Srinivasan, C. Claudianos, Honeybees Learn Odour Mixtures via a  
591 Selection of Key Odorants. *PLoS One.* **5**, e9110 (2010).
- 592 42. B. H. Smith, S. Cobey, The olfactory memory of the honeybee *Apis mellifera*. II. Blocking between  
593 odorants in binary mixtures. *J. Exp. Biol.* **195**, 91–108 (1994).
- 594 43. M. Thoma, B. S. Hansson, M. Knaden, Compound valence is conserved in binary odor mixtures in  
595 *Drosophila melanogaster*. *J. Exp. Biol.* **217**, 3645–3655 (2014).
- 596 44. L. Badel, K. Ohta, Y. Tsuchimoto, H. Kazama, Decoding of Context-Dependent Olfactory Behavior in  
597 *Drosophila*. *Neuron.* **91**, 155–167 (2016).
- 598 45. J. M. Young, J. Wessnitzer, J. D. Armstrong, B. Webb, Elemental and non-elemental olfactory learning in  
599 *Drosophila*. *Neurobiol. Learn. Mem.* **96**, 339–352 (2011).
- 600 46. R. A. A. Campbell *et al.*, Imaging a population code for odor identity in the *Drosophila* mushroom body.  
601 *J. Neurosci.* **33**, 10568–81 (2013).
- 602 47. M. L. Mayer, G. L. Westbrook, P. B. Guthrie, Voltage-dependent block by Mg<sup>2+</sup> of NMDA responses in  
603 spinal cord neurones. *Nature.* **309**, 261–263 (1984).
- 604 48. I. Sinakevitch, Y. Grau, N. J. Strausfeld, S. Birman, Dynamics of glutamatergic signaling in the  
605 mushroom body of young adult *Drosophila*. *Neural Dev.* **5**, 10 (2010).
- 606 49. D. Oswald *et al.*, Activity of defined mushroom body output neurons underlies learned olfactory behavior  
607 in *Drosophila*. *Neuron.* **86**, 417–427 (2015).
- 608 50. K. Sato *et al.*, Insect olfactory receptors are heteromeric ligand-gated ion channels. *Nature.* **452**, 1002–  
609 1006 (2008).
- 610 51. J. Schuckel, S. Meisner, P. H. Torkkeli, A. S. French, Dynamic properties of *Drosophila* olfactory  
611 electroantennograms. *J. Comp. Physiol. A Neuroethol. Sensory, Neural, Behav. Physiol.* **194**, 483–489  
612 (2008).
- 613 52. P. Szyszka, R. C. Gerkin, C. G. G. Galizia, B. H. B. H. Smith, High-speed odor transduction and pulse  
614 tracking by insect olfactory receptor neurons. *Proc. Natl. Acad. Sci. U. S. A.* **111**, 16925–30 (2014).
- 615 53. A. Egea-Weiss, A. Renner, C. J. Kleineidam, P. Szyszka, High Precision of Spike Timing across  
616 Olfactory Receptor Neurons Allows Rapid Odor Coding in *Drosophila*. *iScience.* **4**, 76–83 (2018).
- 617 54. S. Krofczik, R. Menzel, M. P. Nawrot, Rapid odor processing in the honeybee antennal lobe network.  
618 *Front. Comput. Neurosci.* **2**, 9 (2009).
- 619 55. F. Korner-Nievergelt *et al.*, *Bayesian data analysis in ecology using linear models with R, BUGS, and*  
620 *Stan* (Academic Press, 2015).
- 621 56. R Core Team, *R: A Language and Environment for Statistical Computing*. R Foundation for Statistical

622 Computing. *R Found. Stat. Comput. Vienna, Austria.* (2012), (available at <http://www.r-project.org>).

623  
624 **Acknowledgements:** We thank Stefanie Neupert for advice on the statistics and comments on the  
625 manuscript, C. Giovanni Galiza, Thomas Nowotny and Mario Pannunzi for comments on the manuscript  
626 and Cansu Tafrali for help with the experiments. **Funding:** This project was funded by the Human Frontier  
627 Science Program (RGP0053/2015 to PS). **Author contributions:** PS conceptualized and designed the  
628 study. YMG and AS performed the data collection. TT wrote the video processing script and provided  
629 expertise on the analysis. YMG and AS performed the video processing. AS performed the statistical  
630 analysis. PS, YMG and AS wrote and edited the manuscript. PS supervised the study. **Competing interests:**  
631 The authors declare that they have no competing interests. **Data and materials availability:** All data is  
632 either supplied in this paper or in the Supplementary Materials, or can be requested directly from the  
633 authors.

636

## Figures

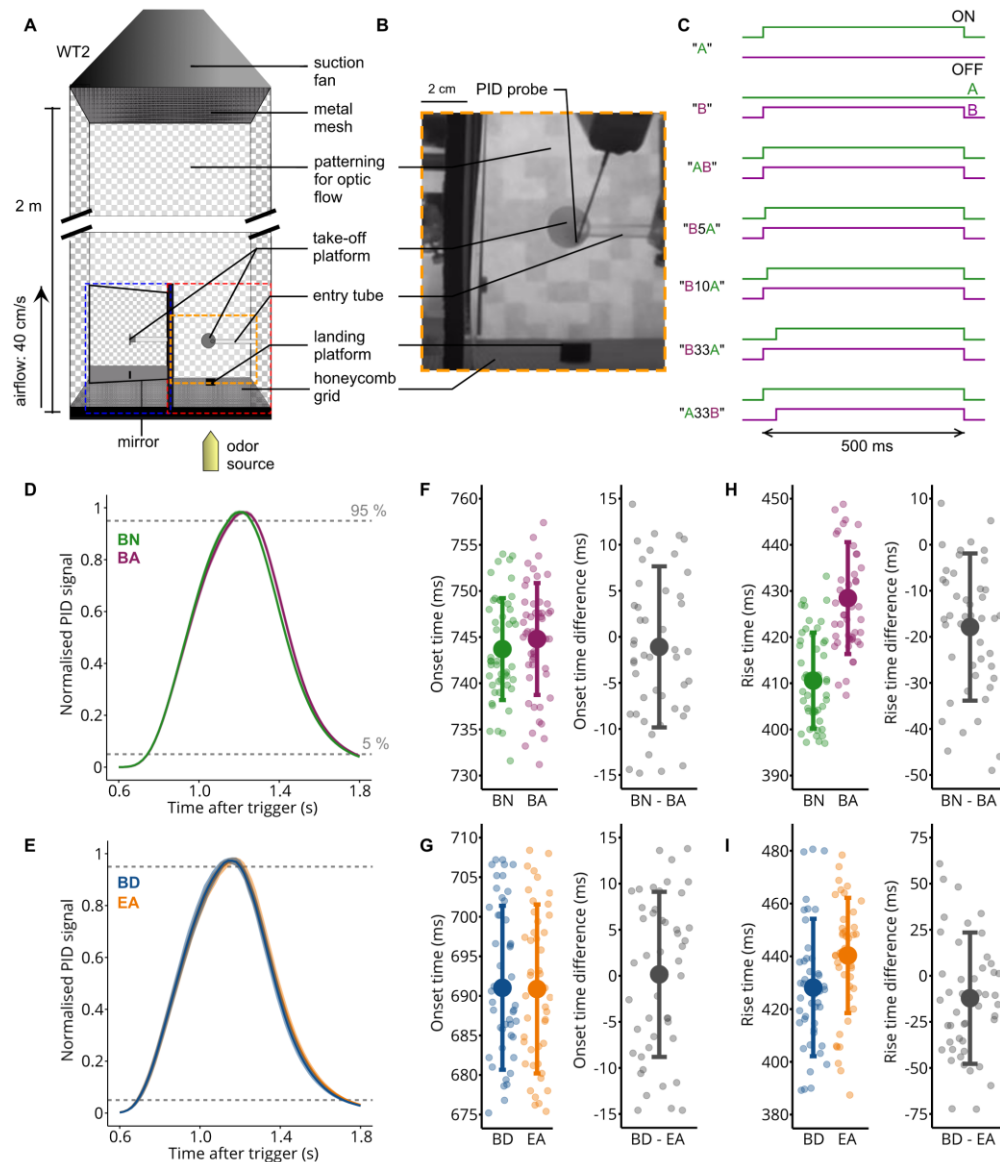

637

638

**Fig. 1. Delivering temporally precise olfactory stimuli in a wind tunnel.**

639

640

641

642

643

644

645

646

647

648

649

650

(A) Diagram of wind tunnel 2 (WT 2). Red and blue dashed boxes indicate the captured x-y and z-y planes respectively. The olfactory stimulator was placed outside of the wind tunnel to minimize turbulences. The orange box outlines in the diagram the image in (B). (B) The layout of WT 2, showing the position where the odorant concentrations were recorded using a PID. (C) Valve states for the different stimuli. The attractive odorant A and aversive odorant B are represented in green and magenta respectively. When asynchronous mixtures were presented, the first odorant was always given for 500 ms, and the following odorant with an onset delay. Both odorants had the same offset time. Pulses were repeated every 2 s. (D) PID recordings of pulsed stimuli for the odorant pair with innate valence 2-butanone (BN, green) and butanal (BA, magenta) (mean and SD over 50 pulses). Valves opened for 500 ms. Color code applies throughout the figures. Each PID signal was normalized to the maximum concentration reached. (E) Same as (D) for the odorant pair with conditioned valence 2,3-butanedione (BD, blue) and ethyl acetate (EA, orange), averaged over 50 pulses. (F) Left: Onset time (time taken to reach 5 % of maximum concentration



651  
652  
653  
654  
655  
656  
657

after valve trigger) for BN and BA (mean and SD over 50 pulses). Individual points represent the onsets for each pulse. Right: Onset time difference between pairs of BN and BA pulses (mean and SD over 50 pulses). (G) Same as (F) for BD and EA. (H) Left: Rise time (time take to reach 95 % of maximum concentration from the 5% onset time) for BN and BA (mean and SD over 50 pulses). Individual points represent the rise times for each pulse. Right: Mean rise time difference between pairs of BN and BA pulses (mean and SD over 50 Pulses). (I) Same as (H) for BD and EA.

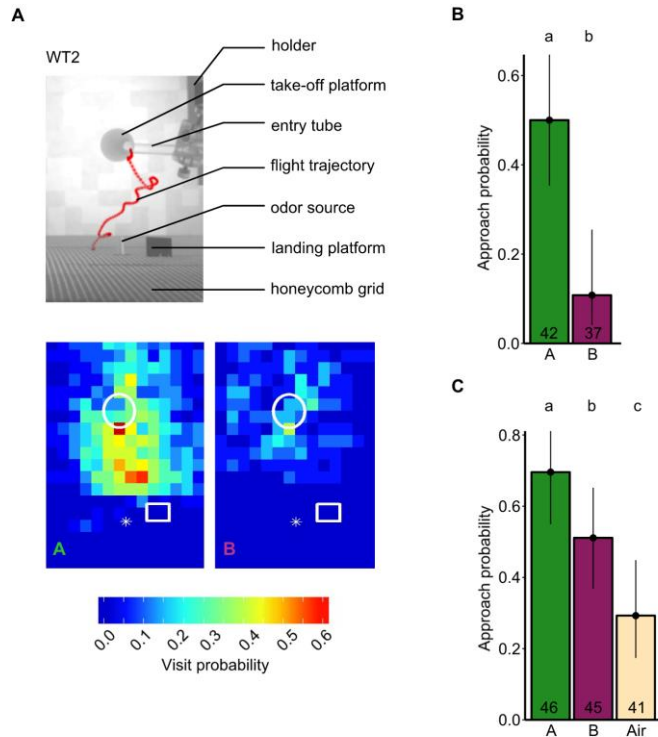

658  
659

**Fig. 2. Odor tracking in the wind tunnel.**

660  
661  
662  
663  
664  
665  
666  
667  
668  
669  
670  
671

(A) Top: Minimum intensity projection of a movie of a flying fly (red) in the wind tunnel during stimulation with A (BN). Bottom: Visit probability plot equivalent to top image for A (BN) and B (BZ) respectively in odorant pair BN/BZ (set 1). Each bin represents 20 x 20 pixels in the image, corresponding to 7.6 x 7.6 mm at the height of the landing platform. Each bin shows the mean binary value across flies. The take-off platform (white circle), landing platform (white rectangle) and odor source (white star) are indicated for position reference. n = 24 and 20 for A and B respectively. (B) Approach probability to cross the half distance between take-off platform and landing platform for BN (A) and BZ (B). Filled points represent the fitted value from the GLM. Error bars represent the 95 % credible intervals. The lower case letters represent significantly different responses for the different odorants; this applies throughout the figure. Numbers in bars indicate the number of flies; this applies throughout all figures. (C) Same as in B but for BN (A), BA (B) and a blank air stimulus (Air).

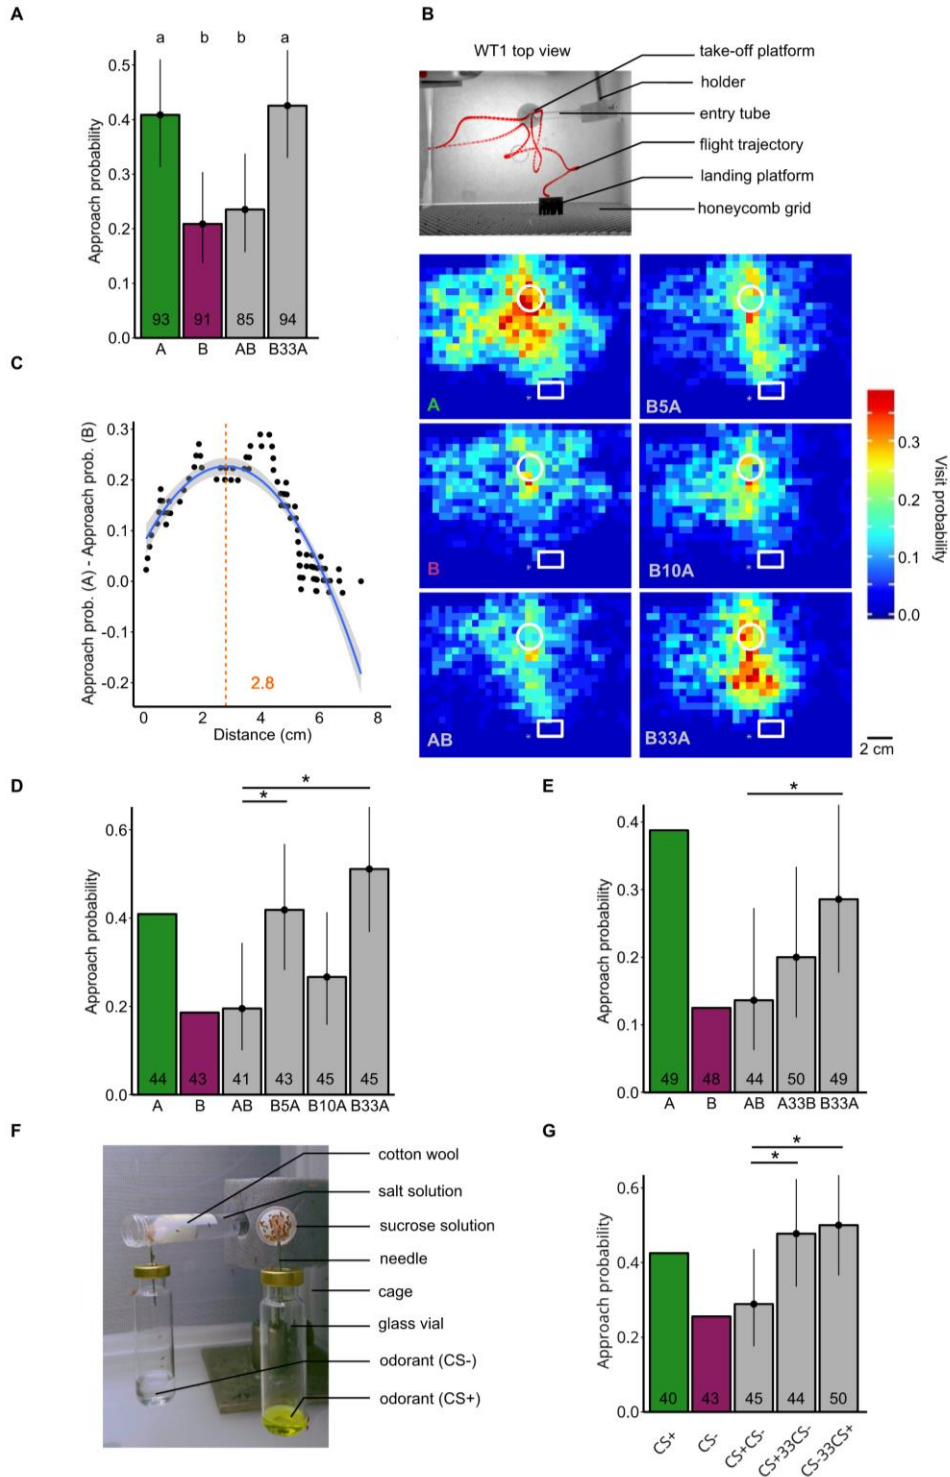

**Fig. 3. Stimulus onset asynchrony makes a mixture of odorants with opposing innate or conditioned valence attractive.**

(A) Approach probability determined by the half distance-threshold for the single odorants BN (A), BA (B), their synchronous mixture (AB) and their asynchronous mixture (B33A). Filled points represent the fitted value from the GLM. Error bars represent the 95 % credible intervals. The lower case letters represent

678 significantly different responses to the odorant treatments; this is the case throughout the figure (this dataset  
679 is pooled from experiments shown in (D) and (E)). **(B)** Top: Minimum intensity projection of a movie of a  
680 flying fly (red) in the wind tunnel during stimulation with BN (A). Bottom: Visit probability maps of the  
681 wind tunnel image in top for A (BN) and B (BA) and the synchronous (AB) and asynchronous (B5A, B10A,  
682 B33A) mixtures. The take-off platform (white circle), landing platform (white rectangle) and odor source  
683 (white star) are indicated for position reference.  $n = 44, 43, 41, 43, 45$  and  $45$  for A, B, AB, B5A, B10A  
684 and B33A respectively. **(C)** Thresholding method that uses the distance which separates flies' approach  
685 probabilities for A and B best (see "maximized A-B difference threshold" in Materials and Methods). Each  
686 point represents the proportion of A-stimulated flies that approached the target by the given minimum  
687 distance minus the proportion of B-stimulated flies. The blue trend line was fitted using locally weighted  
688 scatterplot smoothing. The orange dashed line and value represents the peak of the trend line in cm. **(D)**  
689 Approach probability for odorant mixtures with different asynchronies, determined by the maximized A-B  
690 difference thresholding method shown in (C). Stars represent significantly different responses between AB  
691 and the other mixtures. Since A and B are used to determine the threshold, they were not included in the  
692 statistical analysis and thus do not have fitted values or credible intervals. **(E)** Approach probability for  
693 odorant mixtures presented using different odorant orders, using the maximized A-B difference  
694 thresholding method. **(F)** Image of the conditioning setup in which flies were left for autonomous  
695 differential conditioning. Flies can freely fly in the cage and enter the odorized tubes containing cotton wool  
696 soaked either with aversive salt solution or attractive sucrose solution. **(G)** Approach probability for odorant  
697 mixtures with conditioned valences, using the maximized A-B difference thresholding method. Odorants  
698 BD and EA were used equally as often as the CS+ and CS-. Points and error bars are the same in (A).
